# Supplementary material for: Aligning work-as-imagined and work-as-done using FRAM on a hospital ward: a roadmap
Source: HighWire-hosted journal article supplement (doi:10.1136/bmjoq-2022-001992), 2022-10-01

**Appendix A:** FRAM<sub>wad</sub> of the nurses' working methods for applying physical restraints on the ward as used during the last FRAM interview. The FRAM functions in red refer to an individual nurse, whereas purple indicates multiple nurses. Blue and green signify functions with the physician and a patients' family members / legal representatives respectively.

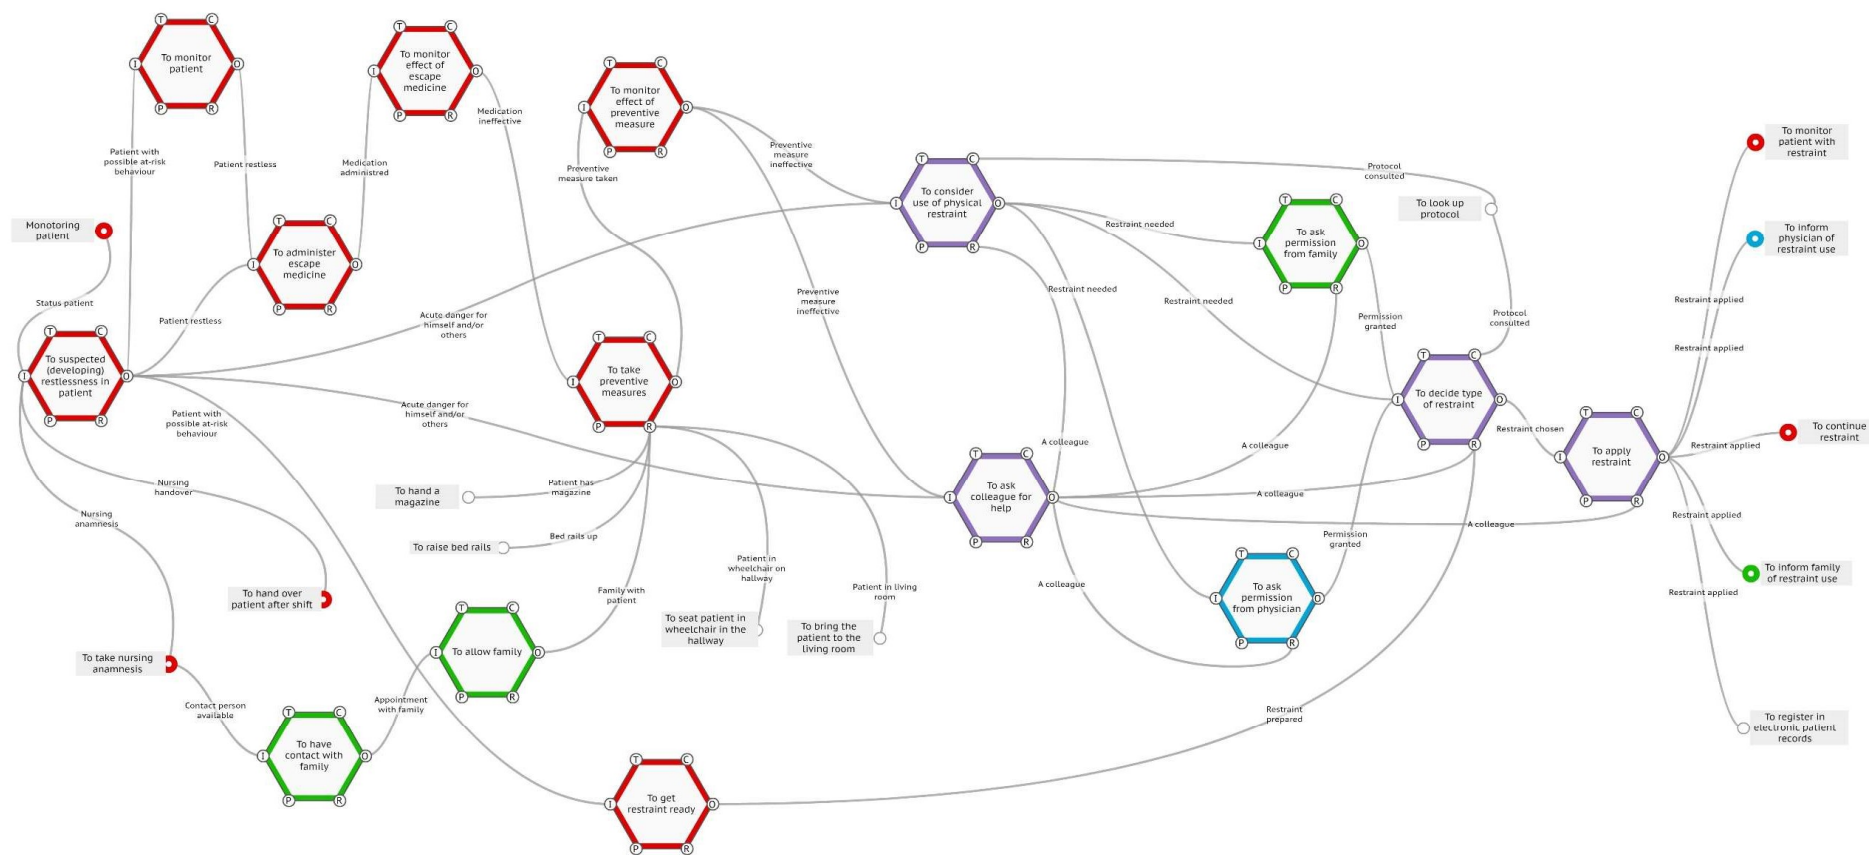

**Appendix B:** FRAM<sub>wai</sub> of the hospital wide protocol for applying physical restraints as used during the last FRAM interview. The green FRAM functions are labelled with ‘steps’ as indicated in the protocol. The blue functions refer to requirements offered in the main text of the protocol. The grey functions refer to other work documents and protocols.

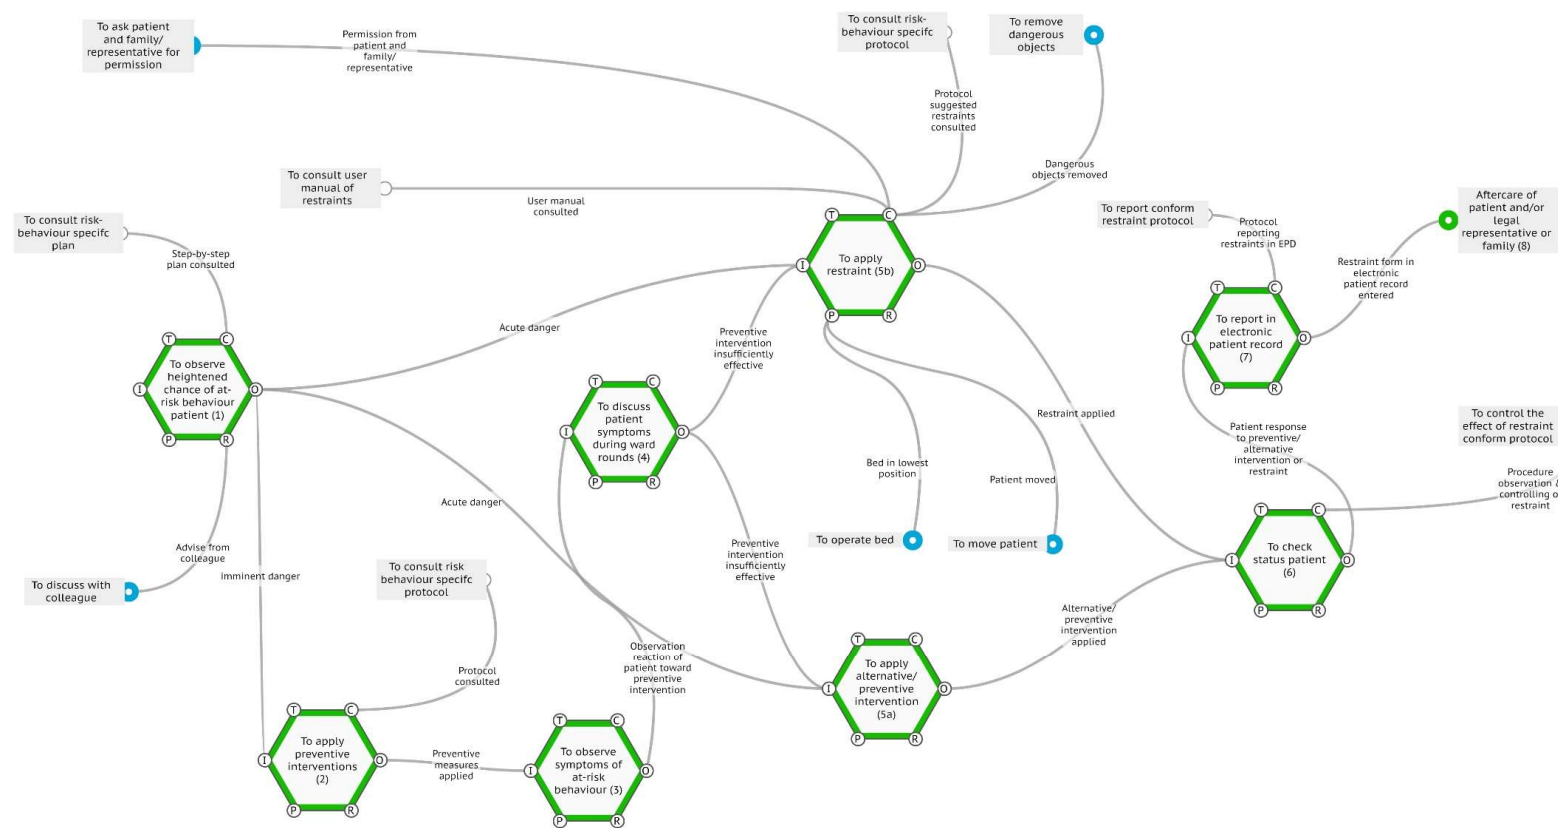

Supplement: bmjoq-2022-001992supp001_data_supplement.pdf [file bmjoq-2022-001992supp001_data_supplement.pdf]
